# Supplementary material for: Costs of Newly Funded Proton Therapy Using Time-Driven Activity-Based Costing in The Netherlands
Source: MDPI journal article supplement (doi:10.3390/cancers15020516), 2023-01-14
Supplement: s1 [file s1]

Supplementary Materials S1: Process map

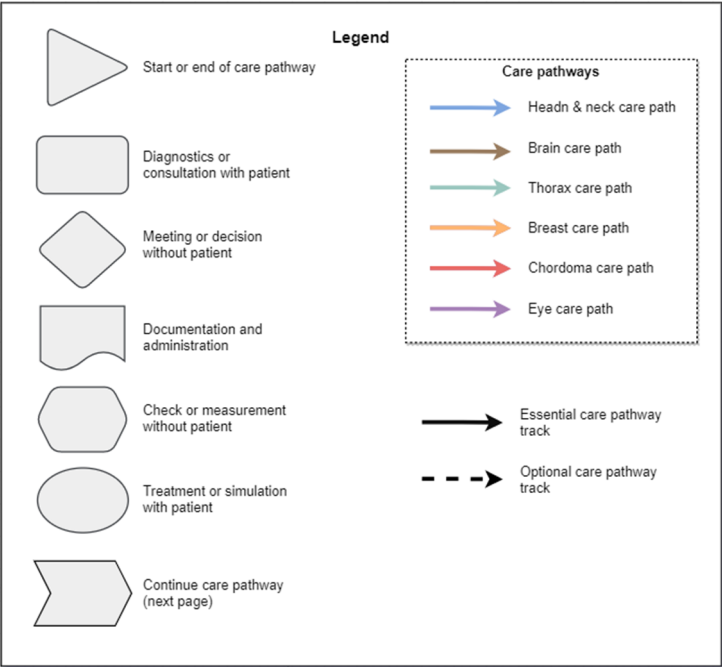

## Plan comparison

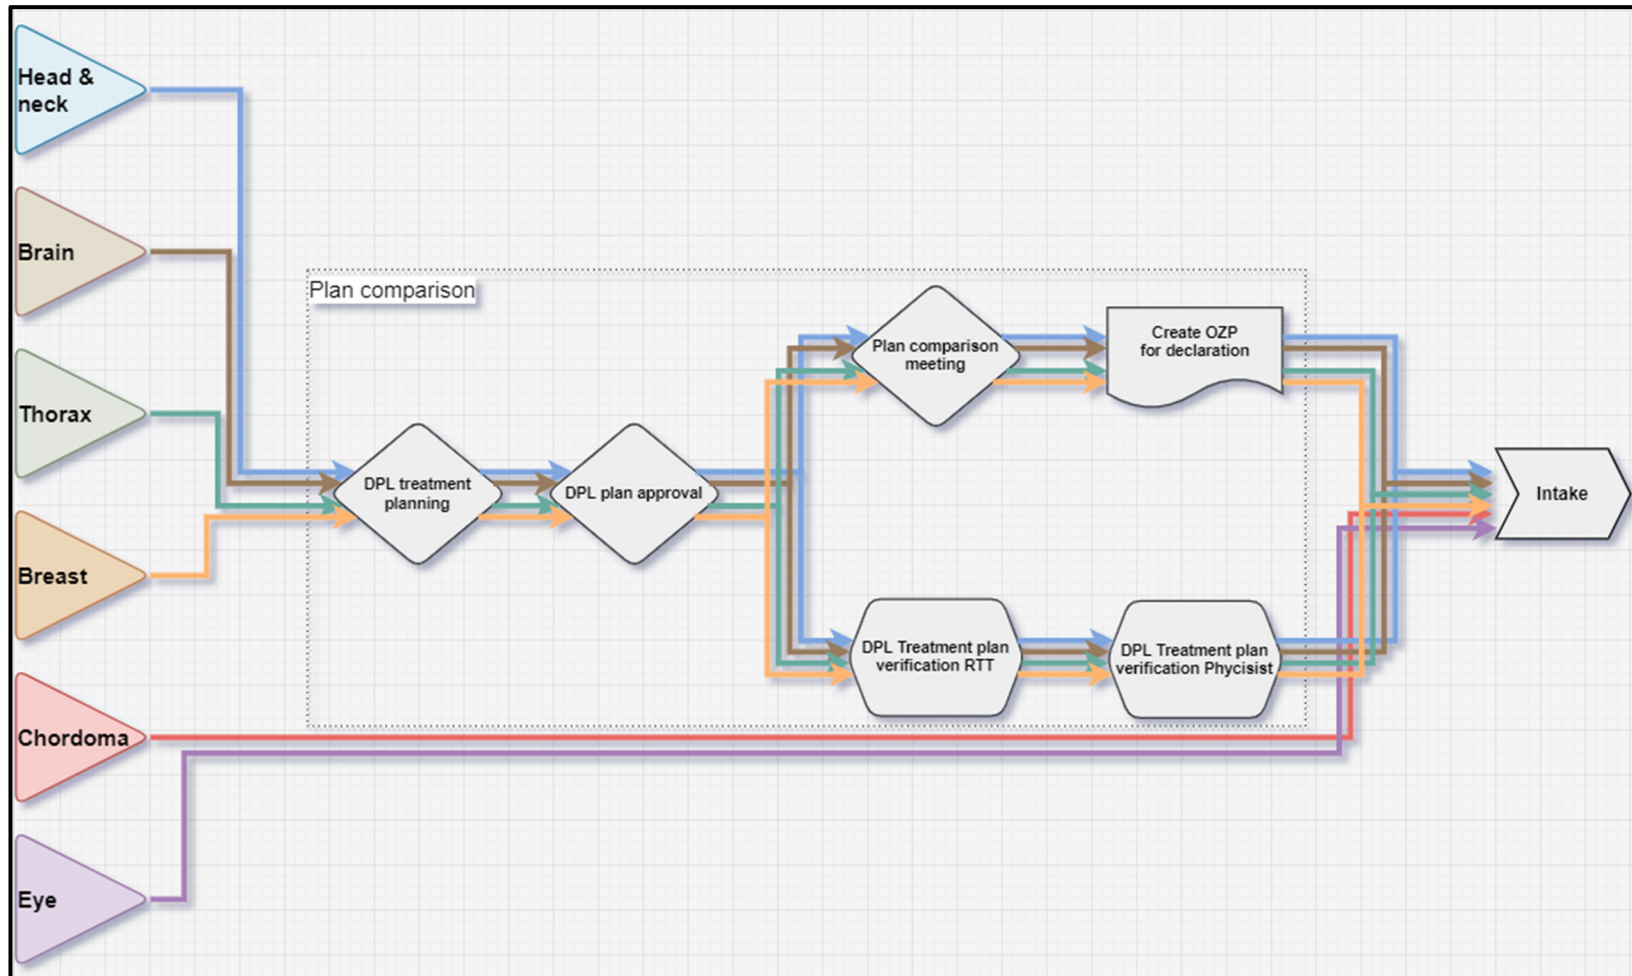

## Patient intake

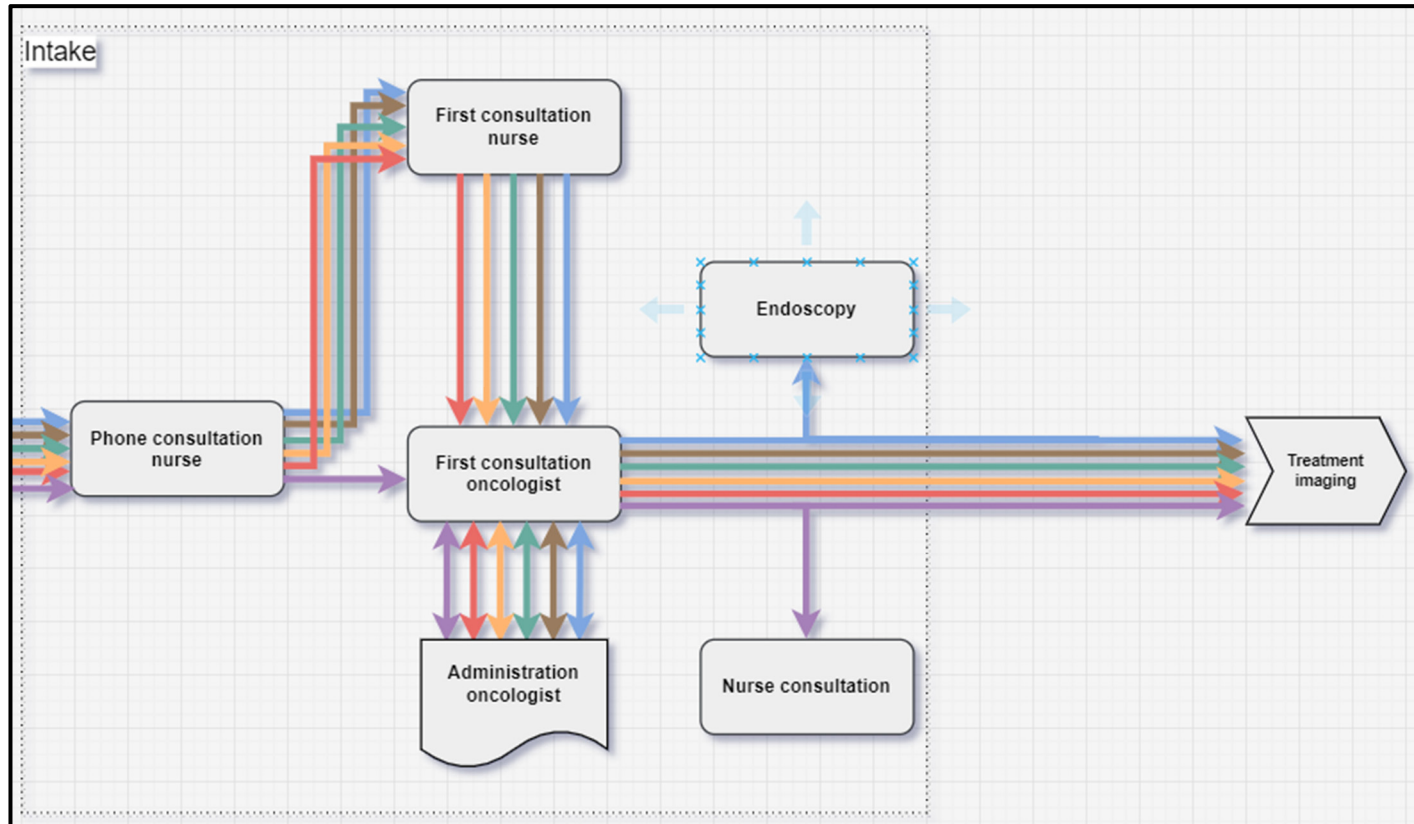

## Treatment imaging

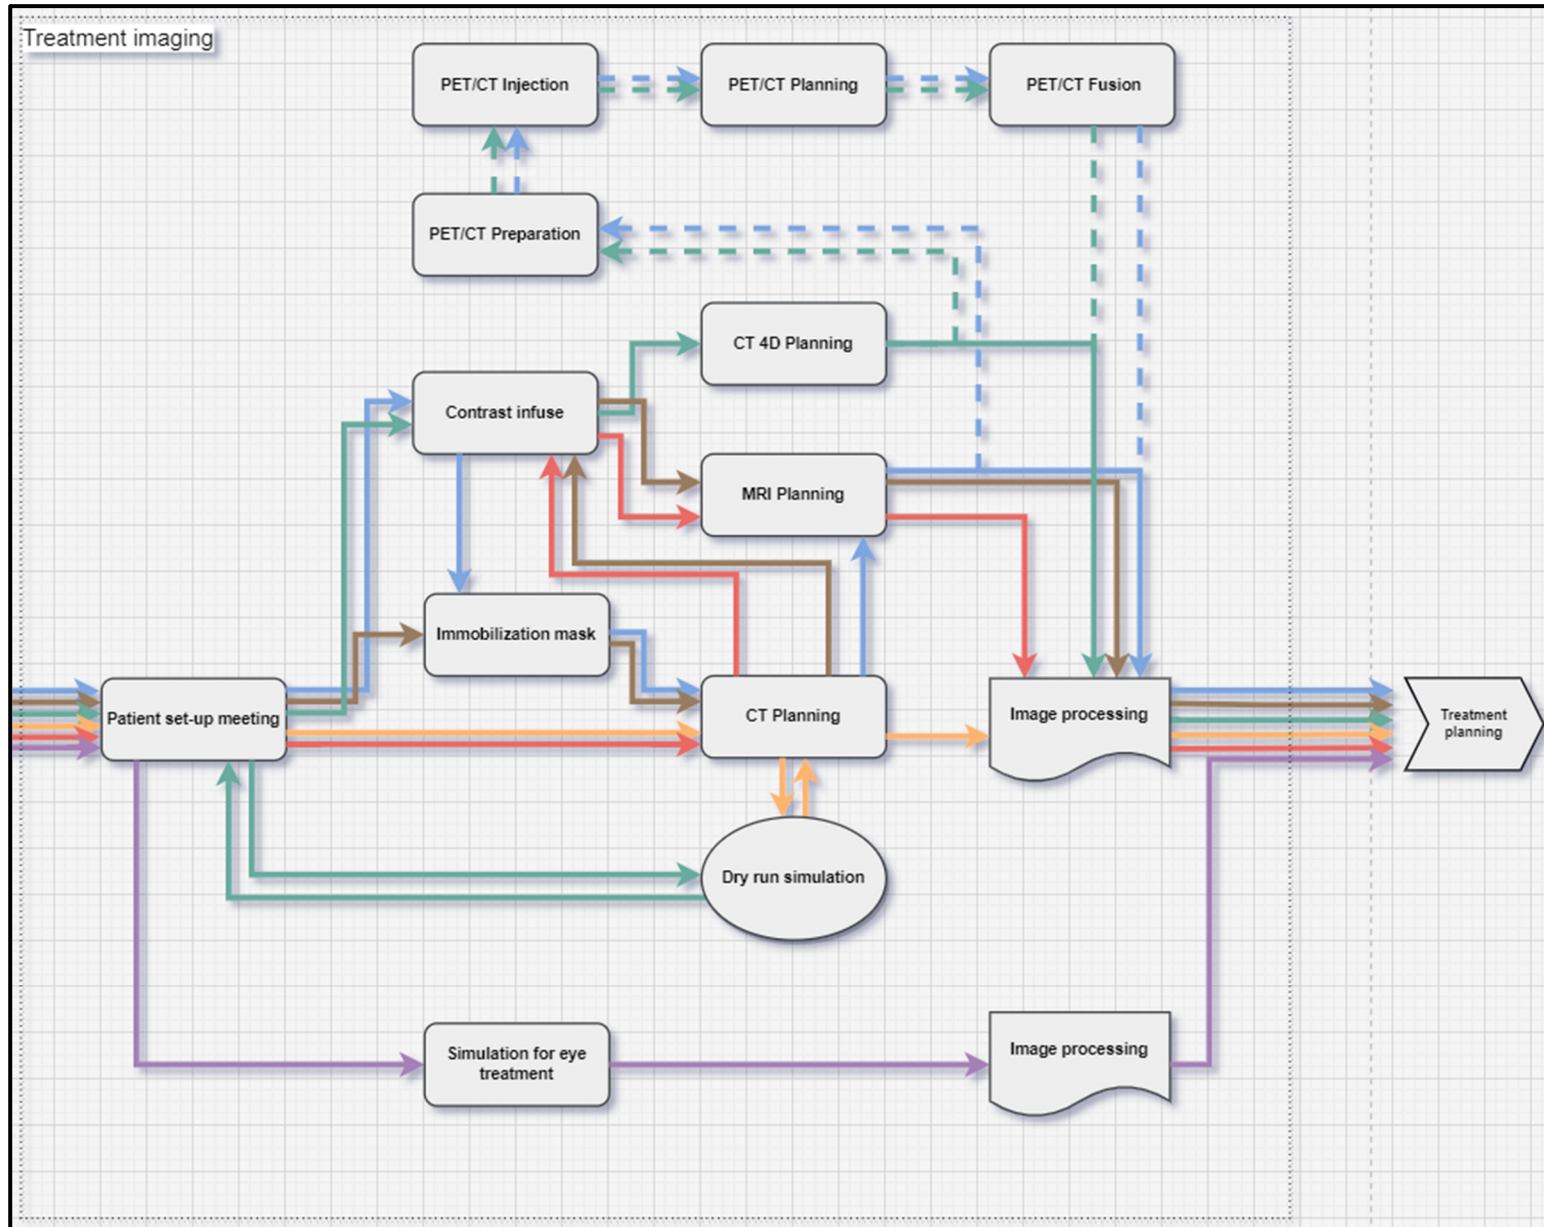

## Treatment planning

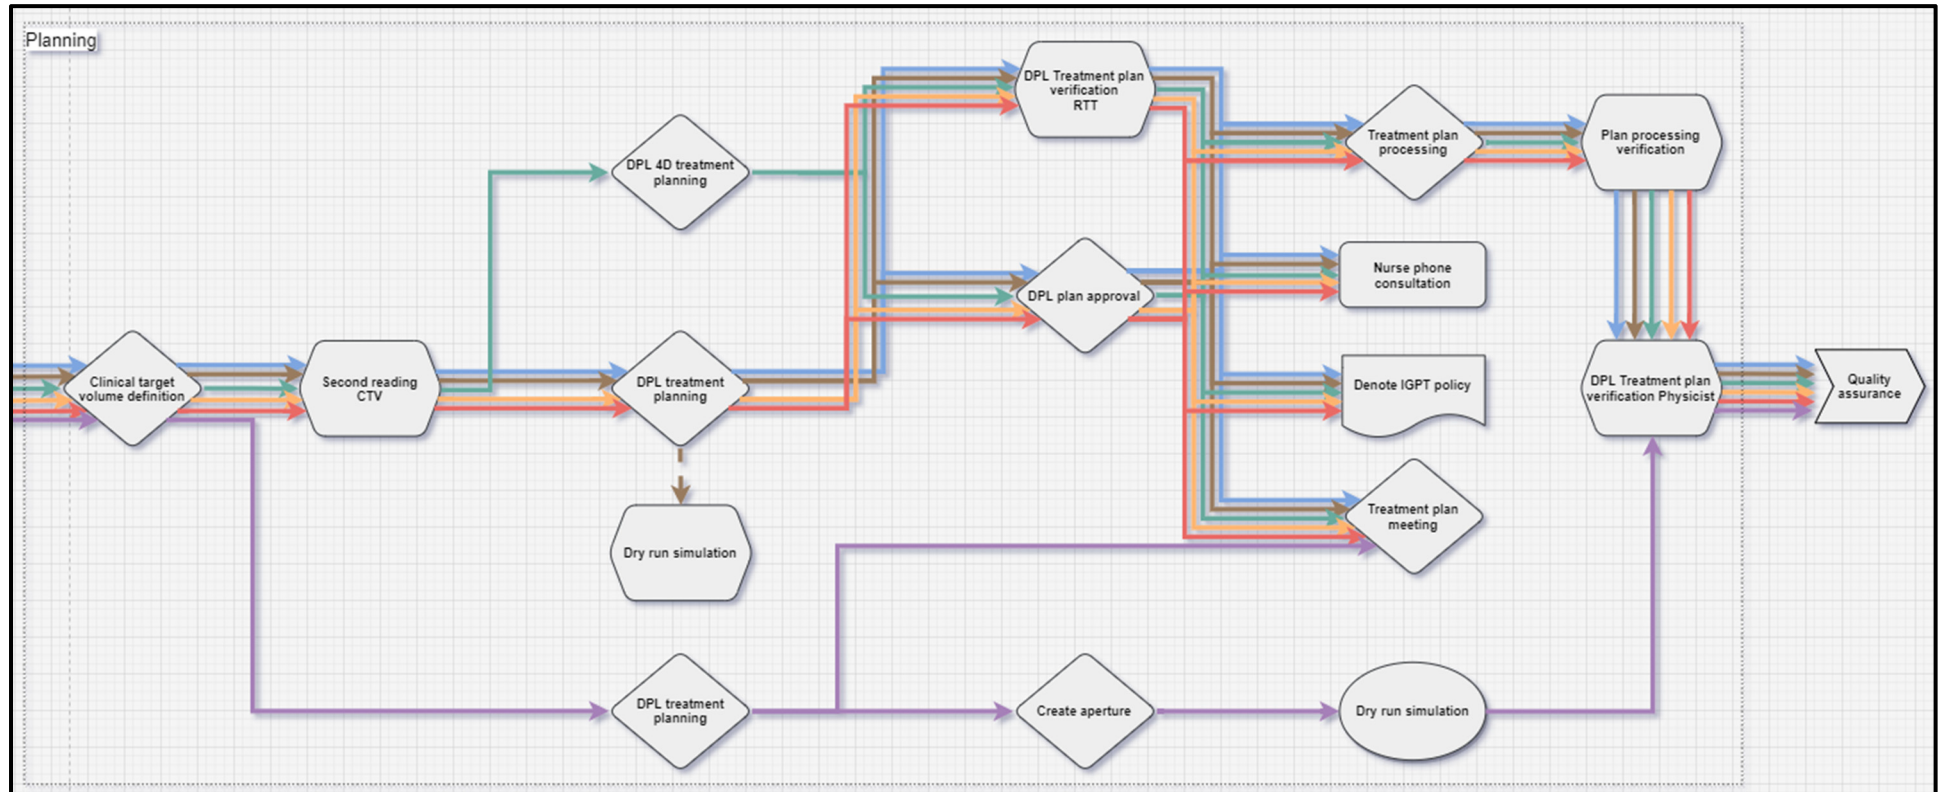

## Quality assurance

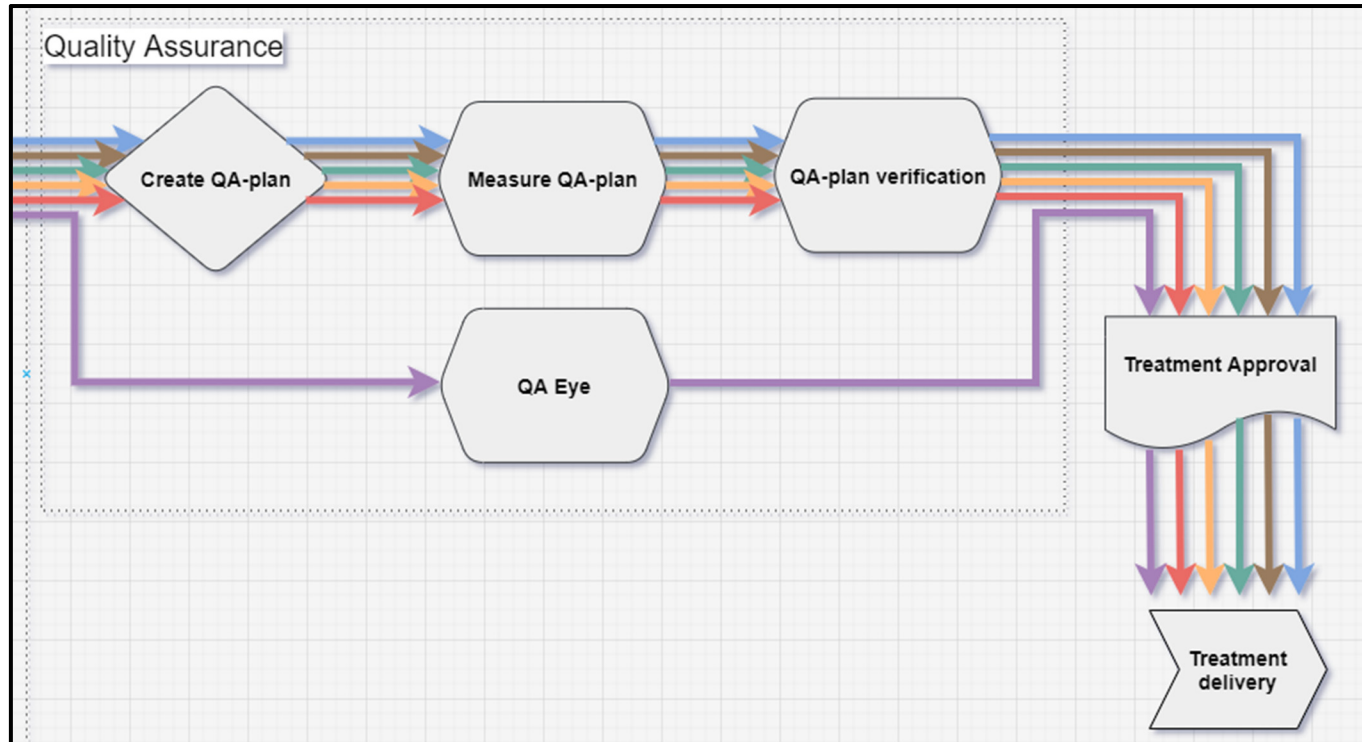



## Treatment delivery, treatment plan adaptation and follow up

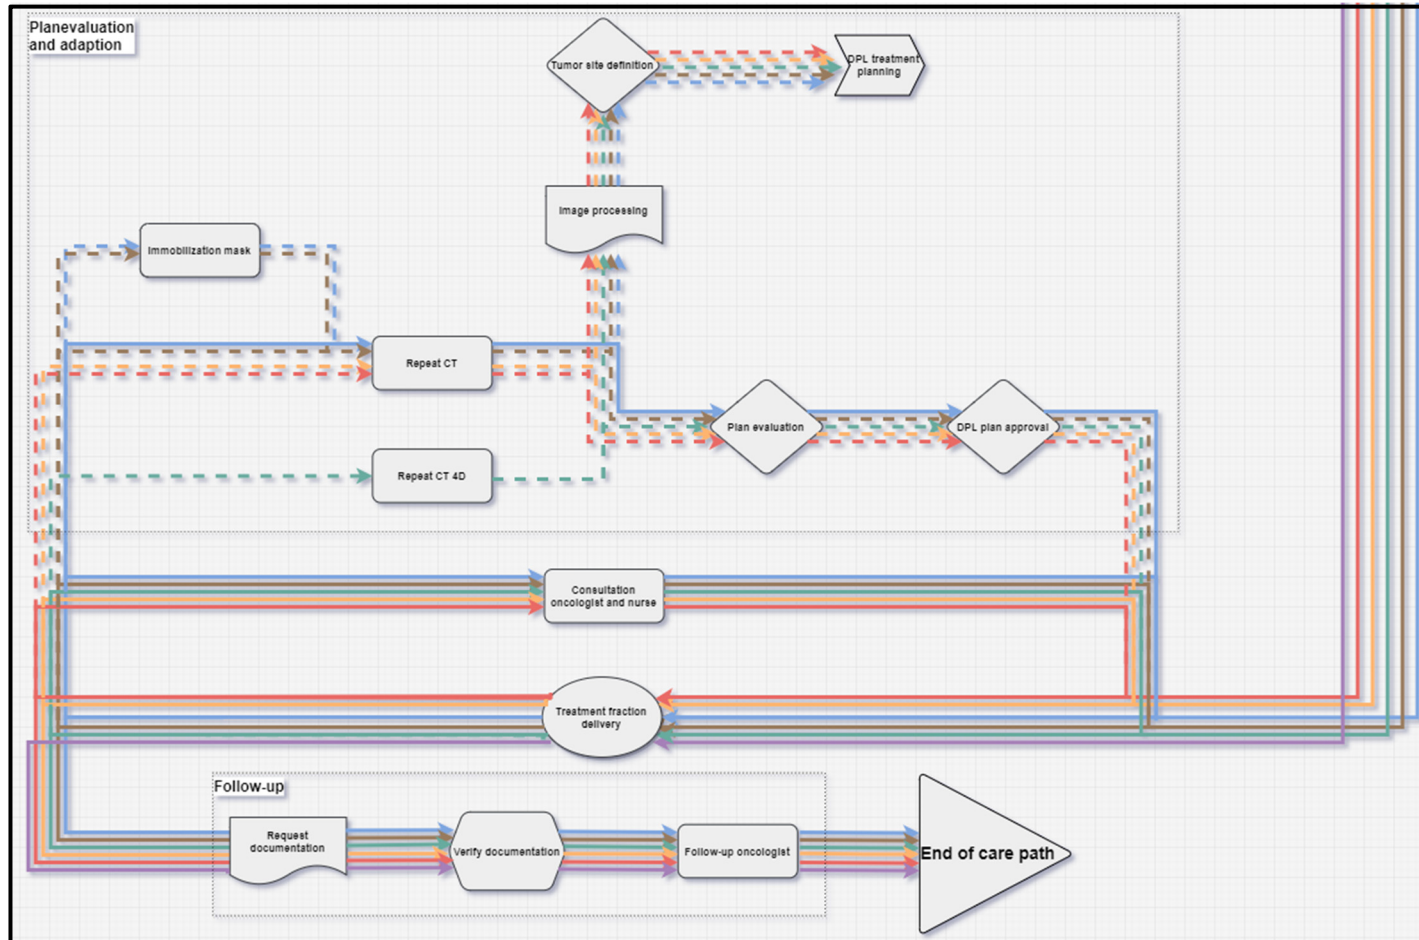

## Supplementary Materials S2: Head & neck

Preparation phase, in minutes

| Care path activities                     | Physician | Nurse | Treatment imaging RTT | Treatment planning RTT | Physicist | Medical physics engineer | Estimation method |
|------------------------------------------|-----------|-------|-----------------------|------------------------|-----------|--------------------------|-------------------|
| <i>Treatment planning for comparison</i> |           |       |                       | 45                     |           |                          | Time recording    |
| <i>Approve treatment plan</i>            | 25        |       |                       |                        |           |                          | Interview         |
| <i>Plan comparison meeting</i>           | 10*       |       |                       | 5                      | 5         |                          | Interview         |
| <i>Treatment plan check</i>              |           |       |                       | 10                     | 30        |                          | Interview         |
| Phone consultation                       |           | 15    |                       |                        |           |                          | R&V system        |
| First consultation + Endoscopy           | 45        | 60    |                       |                        |           |                          | Interview         |
| Overall administration                   | 40        |       |                       |                        |           |                          | Interview         |
| Set-up meeting                           | 5         |       | **                    |                        |           |                          | Interview         |
| Immobilization mask                      |           |       | **                    |                        |           |                          | R&V system        |
| Contrast infuse                          |           | 10    |                       |                        |           |                          | R&V system        |
| CT planning                              |           |       | 90*                   |                        |           |                          | R&V system        |
| MRI planning                             |           |       | 120*                  |                        |           |                          | R&V system        |
| PET planning                             |           |       | 200*                  |                        |           |                          | R&V system        |
| Image processing                         |           |       |                       | 515                    |           |                          | Time recording    |
| CTV definition                           | 240       |       |                       |                        |           |                          | Interview         |



|                           |            |            |            |            |           |            |                |
|---------------------------|------------|------------|------------|------------|-----------|------------|----------------|
| Second check definition   | 60*        |            |            |            |           |            | Interview      |
| Treatment planning        |            |            |            | 10         |           |            | Time recording |
| Treatment plan check      |            |            |            | 10         |           |            | Interview      |
| Approve treatment plan    | 30         |            |            |            |           |            | Interview      |
| Treatment plan meeting    | 20*        |            |            | 10         | 10        |            | Interview      |
| Phone consultation        |            | 15         |            |            |           |            | Time recording |
| Treatment plan processing |            |            |            | 10         |           |            | Interview      |
| Plan processing check     |            |            |            | 5          |           |            | Interview      |
| Treatment plan check      |            |            |            |            | 30        |            | Interview      |
| Create QA plan            |            |            |            |            |           | 30         | Interview      |
| Measure QA plan           |            |            |            |            |           | 80*        | Time recording |
| Check QA plan             |            |            |            |            | 2.5       |            | Interview      |
| Treatment approval        |            |            |            |            | 2.5       |            | Interview      |
| <b>TOTAL (excl. PET)</b>  | <b>475</b> | <b>100</b> | <b>210</b> | <b>620</b> | <b>80</b> | <b>110</b> |                |

\* Summed time estimate based on two participating employees.

\*\* Time estimate is included in the “CT planning” task.

N.B: The “PET planning” care path activity, depicted in darker green, is optional.

Treatment and follow-up phase (in minutes)

| Care path activities               | Physician                                                              | Nurse                                                            | Treatment<br>imaging RTT       | Treatment<br>planning RTT | Treatment<br>delivery RTT       | Dietician    | Estimation<br>method        |
|------------------------------------|------------------------------------------------------------------------|------------------------------------------------------------------|--------------------------------|---------------------------|---------------------------------|--------------|-----------------------------|
| Treatment delivery*                |                                                                        |                                                                  |                                |                           | 30 min · 35 · 3<br>RTT's = 3150 |              | R&V system                  |
| Consultation during<br>treatment** | 15 · 6 = 90                                                            | 20 · 6 = 120                                                     |                                |                           |                                 | 45 · 6 = 270 | Interview and<br>R&V system |
| CT repetition***                   |                                                                        |                                                                  | 15 · 4 · 2 = 120               |                           |                                 |              | R&V system                  |
| Plan evaluation***                 |                                                                        |                                                                  |                                | 90 · 4 = 360              |                                 |              | Interview                   |
| Plan approval***                   | 15 · 4 = 60                                                            |                                                                  |                                |                           |                                 |              | Interview                   |
| Follow-up at XXXX                  | 20 · 4 = 80<br>(After 6 weeks, 3<br>months, 6<br>months, 12<br>months) | 20 · 2 = 40 (After<br>1 <sup>st</sup> week and<br>after 3 weeks) | 120<br>(MRI after 3<br>months) |                           |                                 |              | Interview                   |
| <b>TOTAL</b>                       | <b>230</b>                                                             | <b>160</b>                                                       | <b>240</b>                     | <b>360</b>                | <b>3150</b>                     | <b>270</b>   |                             |

\* Each treatment fraction is executed by 3 RTTs each day.

\*\* Summed estimate, based on weekly consultations from the 2<sup>nd</sup> week of treatment delivery (6 in total).

\*\*\* Summed estimate, based on 4 evaluation CT scans during the treatment phase.

Total human resource consumption (in minutes)

|                               | Physician  | Nurse      | Treatment<br>imaging RTT | Treatment<br>planning RTT | Physicist | Medical<br>physics<br>engineer | Treatment<br>delivery RTT | Dietician |
|-------------------------------|------------|------------|--------------------------|---------------------------|-----------|--------------------------------|---------------------------|-----------|
| Preparation phase             | 475        | 100        | 210                      | 620                       | 80        | 110                            | -                         | -         |
| Treatment and follow-up phase | 230        | 160        | 240                      | 360                       | -         | -                              | 3150                      | 270       |
| <b>TOTAL</b>                  | <b>705</b> | <b>260</b> | <b>450</b>               | <b>980</b>                | <b>80</b> | <b>110</b>                     | <b>3150</b>               | 270       |

Available fractionation schemes

| Fractionation schemes  |                        |                        |                        |
|------------------------|------------------------|------------------------|------------------------|
| Oropharynx             | Nasopharynx            | Larynx                 | Hypopharynx            |
| <b>35 x 2Gy = 70Gy</b> |

## Supplementary Materials S3: Brain

Preparation phase (in minutes)

| Care path activities                     | Physician | Nurse | Treatment imaging RTT | Treatment planning RTT | Physics group | Medical physics engineer | Estimation method |
|------------------------------------------|-----------|-------|-----------------------|------------------------|---------------|--------------------------|-------------------|
| <i>Treatment planning for comparison</i> |           |       |                       | 45                     |               |                          | Time recording    |
| <i>Approve treatment plan</i>            | 25        |       |                       |                        |               |                          | Interview         |
| <i>Plan comparison meeting</i>           | 10*       |       |                       | 5                      | 5             |                          | Interview         |
| <i>Treatment plan check</i>              |           |       |                       | 10                     | 30            |                          | Interview         |
| Overall administration                   | 40        |       |                       |                        |               |                          | Interview         |
| Phone consultation                       |           | 15    |                       |                        |               |                          | R&V system        |
| First consultation                       | 45        | 45    |                       |                        |               |                          | Interview         |
| Set-up meeting                           | 5         |       | **                    |                        |               |                          | Interview         |
| Immobilization mask                      |           |       | **                    |                        |               |                          | R&V system        |
| Contrast infuse                          |           | 10    |                       |                        |               |                          | R&V system        |
| CT planning                              |           |       | 80*                   |                        |               |                          | R&V system        |
| MRI planning                             |           |       | 120*                  |                        |               |                          | R&V system        |
| Image processing                         |           |       |                       | 395                    |               |                          | Time recording    |
| CTV definition                           | 150       |       |                       |                        |               |                          | Interview         |
| Second check definition                  | 60*       |       |                       |                        |               |                          | Interview         |
| Dry-run gantry                           |           |       |                       | 15                     |               |                          | Interview         |

|                           |            |           |            |            |           |           |                |
|---------------------------|------------|-----------|------------|------------|-----------|-----------|----------------|
| Treatment planning        |            |           |            | 30         |           |           | Time recording |
| Treatment plan check      |            |           |            | 10         |           |           | Interview      |
| Approve treatment plan    | 30         |           |            |            |           |           | Interview      |
| Treatment plan meeting    | 20*        |           |            | 10         | 10        |           | Interview      |
| Phone consultation        |            | 15        |            |            |           |           | Time recording |
| Treatment plan processing |            |           |            | 10         |           |           | Interview      |
| Plan processing check     |            |           |            | 5          |           |           | Interview      |
| Treatment plan check      |            |           |            |            | 30        |           | Interview      |
| Create QA plan            |            |           |            |            |           | 30        | Interview      |
| Measure QA plan           |            |           |            |            |           | 60*       | Time recording |
| Check QA plan             |            |           |            |            | 2.5       |           | Interview      |
| Treatment approval        |            |           |            |            | 2.5       |           | Interview      |
| <b>TOTAL</b>              | <b>385</b> | <b>85</b> | <b>200</b> | <b>535</b> | <b>80</b> | <b>90</b> |                |

\* Summed time estimate based on two participating employees.

\*\* Time estimate is included in the “CT planning” task.

Treatment and follow-up phase (in minutes)

| Care path activities | Physician | Treatment delivery RTT                                                         | Estimation method |
|----------------------|-----------|--------------------------------------------------------------------------------|-------------------|
| Treatment delivery*  |           | (28 fraction scheme)<br>$20 \text{ min} \cdot 28 \cdot 3 \text{ RTT's} = 1680$ | R&V system        |

|                                   |                                                                            |                                                         |           |
|-----------------------------------|----------------------------------------------------------------------------|---------------------------------------------------------|-----------|
|                                   |                                                                            | (33 fraction scheme)<br>20 min · 33 · 3 RTT's =<br>1980 |           |
| Consult during treatment**        | (28 fraction scheme)<br>5 · 15 = 75<br>(33 fraction scheme)<br>6 · 15 = 90 |                                                         | Interview |
| Follow-up<br>(phone consultation) | 3 · 15 = 45<br>(After 1 month, 6 months and 1 year)                        |                                                         | Interview |
| <b>TOTAL (28 fraction scheme)</b> | <b>120</b>                                                                 | <b>1680</b>                                             |           |
| <b>TOTAL (33 fraction scheme)</b> | <b>135</b>                                                                 | <b>1980</b>                                             |           |

\* Each treatment fraction is executed by 3 RTTs each day

\*\* Summed estimate, based on weekly consultations

Total human resource consumption (in minutes)

|                                                       | Physician | Nurse | Treatment<br>imaging RTT | Treatment<br>planning RTT | Physicist | Medical<br>physics<br>engineer | Treatment<br>delivery RTT |
|-------------------------------------------------------|-----------|-------|--------------------------|---------------------------|-----------|--------------------------------|---------------------------|
| Preparation phase                                     | 385       | 85    | 200                      | 535                       | 80        | 90                             |                           |
| Treatment and follow-up phase<br>(28 fraction scheme) | 120       | -     | -                        | -                         | -         | -                              | 1680                      |



|                                                       |     |    |     |     |    |    |      |
|-------------------------------------------------------|-----|----|-----|-----|----|----|------|
| Treatment and follow-up phase<br>(33 fraction scheme) | 135 | -  | -   | -   | -  | -  | 1980 |
| TOTAL (28 fraction scheme)                            | 505 | 85 | 200 | 535 | 80 | 90 | 1680 |
| TOTAL (33 fraction scheme)                            | 520 | 85 | 200 | 535 | 80 | 90 | 1980 |

Available fractionation schemes

| Fractionation schemes                                                   |                            |                            |                            |                          |
|-------------------------------------------------------------------------|----------------------------|----------------------------|----------------------------|--------------------------|
| Meningeoma                                                              | Low grade glioma           | Anaplastic glioma          | Hyopfyse                   | Craniofayngioma          |
| Benigne: <b>30</b> x 1.8Gy = 54Gy<br>Atypical: <b>30</b> x 2.0Gy = 60Gy | <b>28</b> x 1.8Gy = 50.4Gy | <b>33</b> x 1.8Gy = 59.4Gy | <b>28</b> x 1.8Gy = 50.4Gy | <b>30</b> x 1.8Gy = 54Gy |

## Supplementary Materials S4: Breast

Preparation phase (in minutes)

| Care path activities                         | Physician | Nurse | Treatment<br>imaging RTT | Treatment<br>planning RTT | Physics<br>group | Medical physics<br>engineer | Estimation<br>method |
|----------------------------------------------|-----------|-------|--------------------------|---------------------------|------------------|-----------------------------|----------------------|
| <i>Treatment planning for<br/>comparison</i> |           |       |                          | 35                        |                  |                             | Time recording       |
| <i>Approve treatment plan</i>                | 25        |       |                          |                           |                  |                             | Interview            |
| <i>Plan comparison meeting</i>               | 10*       |       |                          | 5                         | 5                |                             | Interview            |
| <i>Treatment plan check</i>                  |           |       |                          | 10                        | 30               |                             | Interview            |
| Phone consultation                           |           | 15    |                          |                           |                  |                             | Time recording       |
| First consultation                           | 45        | 45    |                          |                           |                  |                             | Interview            |

|                           |            |           |            |            |           |           |                |
|---------------------------|------------|-----------|------------|------------|-----------|-----------|----------------|
| Overall administration    | 40         |           |            |            |           |           | Interview      |
| Set-up meeting            | 5          |           | **         |            |           |           | Interview      |
| CT planning               |            |           | 80*        |            |           |           | R&V system     |
| Dry-run gantry            |            |           | 30*        |            |           |           | R&V system     |
| Image processing          |            |           |            | 50         |           |           | Time recording |
| CTV definition            | 150        |           |            |            |           |           | Interview      |
| Second check definition   | 40*        |           |            |            |           |           | Interview      |
| Treatment planning        |            |           |            | 10         |           |           | Time recording |
| Treatment plan check      |            |           |            | 10         |           |           | Interview      |
| Approve treatment plan    | 30         |           |            |            |           |           | Interview      |
| Treatment plan meeting    | 20*        |           |            | 10         | 10        |           | Interview      |
| Phone consultation        |            | 15        |            |            |           |           | Time recording |
| Treatment plan processing |            |           |            | 10         |           |           | Interview      |
| Plan processing check     |            |           |            | 5          |           |           | Interview      |
| Treatment plan check      |            |           |            |            | 30        |           | Interview      |
| Create QA plan            |            |           |            |            |           | 30        | Interview      |
| Measure QA plan           |            |           |            |            |           | 60*       | Time recording |
| Check QA plan             |            |           |            |            | 2.5       |           | Interview      |
| Treatment approval        |            |           |            |            | 2.5       |           | Interview      |
| <b>TOTAL</b>              | <b>395</b> | <b>75</b> | <b>110</b> | <b>145</b> | <b>80</b> | <b>90</b> |                |

\* Summed time estimate based on two participating employees.

\*\* Time estimate is included in the “CT planning” task.

Treatment and follow-up phase (in minutes)

| Care path activities                 | Physician                                                                              | Nurse                                                                                  | Treatment delivery RTT                                                                                                                                           | Estimation method |
|--------------------------------------|----------------------------------------------------------------------------------------|----------------------------------------------------------------------------------------|------------------------------------------------------------------------------------------------------------------------------------------------------------------|-------------------|
| Treatment delivery*                  |                                                                                        |                                                                                        | (15 fraction scheme)<br>$30 \text{ min} \cdot 15 \cdot 3 \text{ RTT's} = 1350$<br>(22 fraction scheme)<br>$30 \text{ min} \cdot 22 \cdot 3 \text{ RTT's} = 1980$ | R&V system        |
| Consult during treatment**           | (15 fraction scheme)<br>$2 \cdot 15 = 30$<br>(22 fraction scheme)<br>$3 \cdot 15 = 45$ | (15 fraction scheme)<br>$3 \cdot 15 = 45$<br>(22 fraction scheme)<br>$4 \cdot 15 = 60$ |                                                                                                                                                                  | Interview         |
| Follow-up at XXXX                    | $4 \cdot 20 = 80$<br>(After 2 weeks<br>3 months, 6 months and 1<br>year)               |                                                                                        |                                                                                                                                                                  | Interview         |
| <b>TOTAL</b><br>(15 fraction scheme) | <b>110</b>                                                                             | <b>45</b>                                                                              | <b>1350</b>                                                                                                                                                      |                   |
| <b>TOTAL</b><br>(22 fraction scheme) | <b>125</b>                                                                             | <b>60</b>                                                                              | <b>1980</b>                                                                                                                                                      |                   |

\* Each treatment fraction is executed by 3 RTTs each day

\*\* Summed estimate, based on weekly consultations from the 2<sup>nd</sup> week of treatment delivery.

Total human resource consumption (in minutes)

|                                                       | Physician  | Nurse      | Treatment<br>imaging RTT | Treatment<br>planning RTT | Physicist | Medical<br>physics<br>engineer | Treatment<br>delivery RTT |
|-------------------------------------------------------|------------|------------|--------------------------|---------------------------|-----------|--------------------------------|---------------------------|
| Preparation phase                                     | 395        | 75         | 110                      | 145                       | 80        | 90                             |                           |
| Treatment and follow-up phase (15<br>fraction scheme) | 110        | 45         | -                        | -                         | -         | -                              | 1350                      |
| Treatment and follow-up phase (22<br>fraction scheme) | 125        | 60         | -                        | -                         | -         | -                              | 1980                      |
| <b>TOTAL (15 fraction scheme)</b>                     | <b>505</b> | <b>120</b> | <b>110</b>               | <b>145</b>                | <b>80</b> | <b>90</b>                      | <b>1350</b>               |
| <b>TOTAL (22 fraction scheme)</b>                     | <b>520</b> | <b>135</b> | <b>110</b>               | <b>145</b>                | <b>80</b> | <b>90</b>                      | <b>1980</b>               |

Available fractionation schemes

| Fractionation schemes        |                              |                              |
|------------------------------|------------------------------|------------------------------|
| <b>15 x 2.67Gy = 40.05Gy</b> | <b>20 x 2.67Gy = 53.40Gy</b> | <b>22 x 2.67Gy = 58.74Gy</b> |

## Supplementary Materials S5: Thorax (lymphoma and lung)

Preparation phase (in minutes)

| Care path activities | Physician | Nurse | Treatment<br>imaging RTT | Treatment<br>planning RTT | Physics<br>group | Medical physics<br>engineer | Estimation<br>method |
|----------------------|-----------|-------|--------------------------|---------------------------|------------------|-----------------------------|----------------------|
|----------------------|-----------|-------|--------------------------|---------------------------|------------------|-----------------------------|----------------------|

|                                          |     |    |      |     |    |  |                       |
|------------------------------------------|-----|----|------|-----|----|--|-----------------------|
| <i>Treatment planning for comparison</i> |     |    |      | 105 |    |  | Time recording        |
| <i>Approve treatment plan</i>            | 25  |    |      |     |    |  | Interview             |
| <i>Plan comparison meeting</i>           | 10* |    |      | 5   | 5  |  | Interview             |
| <i>Treatment plan check</i>              |     |    |      | 10  | 30 |  | Interview             |
| Overall administration                   | 40  |    |      |     |    |  | Interview             |
| Phone consultation                       |     | 15 |      |     |    |  | Time recording        |
| First consultation                       | 45  | 45 |      |     |    |  | Interview             |
| Set-up meeting                           | 5   |    | **   |     |    |  | Interview             |
| Contrast infuse                          |     | 10 |      |     |    |  | R&V system            |
| CT 4D planning                           |     |    | 80*  |     |    |  | R&V system            |
| <b>PET planning</b>                      |     |    | 200* |     |    |  | <b>R&amp;V system</b> |
| Dry-run gantry                           |     |    | 30*  |     |    |  | R&V system            |
| Image processing                         |     |    |      | 120 |    |  | Time recording        |
| CTV definition                           | 180 |    |      |     |    |  | Interview             |
| Second check definition                  | 60* |    |      |     |    |  | Interview             |
| Treatment planning                       |     |    |      | 15  |    |  | Time recording        |
| Treatment plan check                     |     |    |      | 10  |    |  | Interview             |
| Approve treatment plan                   | 30  |    |      |     |    |  | Interview             |
| Treatment plan meeting                   | 20* |    |      | 10  | 10 |  | Interview             |
| Phone consultation                       |     | 15 |      |     |    |  | Time recording        |
| Treatment plan processing                |     |    |      | 10  |    |  | Interview             |

|                       |            |           |            |            |           |            |                |
|-----------------------|------------|-----------|------------|------------|-----------|------------|----------------|
| Plan processing check |            |           |            | 5          |           |            | Interview      |
| Treatment plan check  |            |           |            |            | 30        |            | Interview      |
| Create QA plan        |            |           |            |            |           | 30         | Interview      |
| Measure QA plan       |            |           |            |            |           | 70*        | Time recording |
| Check QA plan         |            |           |            |            | 2.5       |            | Interview      |
| Treatment approval    |            |           |            |            | 2.5       |            | Interview      |
| <b>TOTAL</b>          | <b>415</b> | <b>85</b> | <b>110</b> | <b>290</b> | <b>80</b> | <b>100</b> |                |

\* Summed time estimate based on two participating employees.

\*\* Time estimate is included in the “CT planning” task.

N.B: The “PET planning” care path activity, depicted in darker green, is optional.

Treatment and follow-up phase (in minutes)

| Care path activities       | Physician                                                                              | Nurse                                     | Treatment delivery RTT                                                                                                                                           | Estimation method |
|----------------------------|----------------------------------------------------------------------------------------|-------------------------------------------|------------------------------------------------------------------------------------------------------------------------------------------------------------------|-------------------|
| Treatment delivery*        |                                                                                        |                                           | (15 fraction scheme)<br>$25 \text{ min} \cdot 15 \cdot 3 \text{ RTT's} = 1125$<br>(30 fraction scheme)<br>$25 \text{ min} \cdot 30 \cdot 3 \text{ RTT's} = 2250$ | R&V system        |
| Consult during treatment** | (15 fraction scheme)<br>$3 \cdot 15 = 45$<br>(30 fraction scheme)<br>$6 \cdot 15 = 90$ | (30 fraction scheme)<br>$6 \cdot 15 = 90$ |                                                                                                                                                                  | Interview         |



|                                      |                          |              |             |           |
|--------------------------------------|--------------------------|--------------|-------------|-----------|
| Follow-up at XXXX                    | 20<br>(End of treatment) |              |             | Interview |
| <b>TOTAL</b><br>(15 fraction scheme) | <b>65</b>                | -            | <b>1125</b> |           |
| <b>TOTAL</b><br>(30 fraction scheme) | <b>110</b>               | <b>90***</b> | <b>2250</b> |           |

\* Each treatment fraction is executed by 3 RTTs each day

\*\* Summed estimate, based on weekly consultations

\*\*\* Nurse consultations during the treatment phase is not conducted for lymphoma patients (15 and 18 fractionation schemes).

Total human resource consumption (in minutes)

|                                                       | Physician  | Nurse      | Treatment<br>imaging RTT | Treatment<br>planning RTT | Physicist | Medical<br>physics<br>engineer | Treatment<br>delivery RTT |
|-------------------------------------------------------|------------|------------|--------------------------|---------------------------|-----------|--------------------------------|---------------------------|
| Preparation phase                                     | 415        | 85         | 110                      | 290                       | 80        | 100                            |                           |
| Treatment and follow-up phase<br>(15 fraction scheme) | 65         | -          |                          |                           | -         | -                              | 1125                      |
| Treatment and follow-up phase<br>(30 fraction scheme) | 110        | 90         |                          |                           | -         | -                              | 2250                      |
| <b>TOTAL (15 fraction scheme)</b>                     | <b>480</b> | <b>85</b>  | <b>110</b>               | <b>290</b>                | <b>80</b> | <b>100</b>                     | <b>1125</b>               |
| <b>TOTAL (30 fraction scheme)</b>                     | <b>525</b> | <b>175</b> | <b>110</b>               | <b>290</b>                | <b>80</b> | <b>100</b>                     | <b>2250</b>               |

## Available fractionation schemes

| Fractionation schemes                                                      |                                                  |                                              |                                                  |
|----------------------------------------------------------------------------|--------------------------------------------------|----------------------------------------------|--------------------------------------------------|
| Hodgkin Lymphoma                                                           |                                                  | Non-Hodgkin Lymphoma                         |                                                  |
| Early stage <60 year                                                       | Advanced stage <60 year                          | Stage 1/2                                    | Stage 3/4                                        |
| <b>15</b> x 2Gy = 30Gy                                                     | <b>18</b> x 2Gy = 36Gy                           | <b>18</b> x 2Gy = 36Gy                       | <b>15</b> x 2Gy = 30Gy<br><b>18</b> x 2Gy = 36Gy |
|                                                                            |                                                  |                                              |                                                  |
| Non-small cell lung cancer                                                 | Small cell lung cancer                           | Thymoma                                      | Sarcoma                                          |
| <b>30</b> x 2Gy = 60Gy<br><b>25</b> x 2Gy = 50Gy<br><b>30</b> x 2Gy = 60Gy | <b>30</b> x 1.5Gy = 45Gy<br><b>25</b> x 2 = 50Gy | <b>25</b> x 2 = 50Gy<br><b>30</b> x 2 = 60Gy | <b>25</b> x 2 = 50Gy                             |

## Supplementary Materials S6: Chordoma

Preparation phase (in minutes)

| Care path activities    | Physician       | Nurse | Treatment imaging RTT | Treatment planning RTT | Physics group | Medical physics engineer | Estimation method |
|-------------------------|-----------------|-------|-----------------------|------------------------|---------------|--------------------------|-------------------|
| Phone consultation      |                 | 15    |                       |                        |               |                          | Time recording    |
| First consultation      | 45              | 45    |                       |                        |               |                          | Interview         |
| Overall administration  | 40              |       |                       |                        |               |                          | Interview         |
| Set-up meeting          | 5               |       | **                    |                        |               |                          | Interview         |
| Contrast infuse         |                 | 10    |                       |                        |               |                          | R&V system        |
| CT planning             |                 |       | 80*                   |                        |               |                          | R&V system        |
| MRI planning            |                 |       | 120*                  |                        |               |                          | R&V system        |
| Image processing        |                 |       |                       | 155<br>(515)***        |               |                          | Time recording    |
| CTV definition          | 180<br>(360)*** |       |                       |                        |               |                          | Interview         |
| Second check definition | 60*             |       |                       |                        |               |                          | Interview         |
| Treatment planning      |                 |       |                       | 10<br>(480)***         |               |                          | Time recording    |
| Treatment plan check    |                 |       |                       | 10                     |               |                          | Interview         |
| Approve treatment plan  | 30              |       |                       |                        |               |                          | Interview         |
| Treatment plan meeting  | 20*             |       |                       | 10                     | 10            |                          | Interview         |

|                              |            |           |            |             |               |            |                |
|------------------------------|------------|-----------|------------|-------------|---------------|------------|----------------|
| Phone consultation           |            | 15        |            |             |               |            | Time recording |
| Treatment plan processing    |            |           |            | 10          |               |            | Interview      |
| Plan processing check        |            |           |            | 5           |               |            | Interview      |
| Treatment plan check         |            |           |            |             | 30<br>(60)*** |            | Interview      |
| Create QA plan               |            |           |            |             |               | 30         | Interview      |
| Measure QA plan              |            |           |            |             |               | 80*        | Time recording |
| Check QA plan                |            |           |            |             | 2.5           |            | Interview      |
| Treatment approval           |            |           |            |             | 2.5           |            | Interview      |
| <b>TOTAL (spinal column)</b> | <b>380</b> | <b>85</b> | <b>200</b> | <b>200</b>  | <b>45</b>     | <b>110</b> |                |
| <b>TOTAL (skull base)</b>    | <b>560</b> | <b>85</b> | <b>200</b> | <b>1030</b> | <b>75</b>     | <b>110</b> |                |

\* Summed time estimate based on two participating employees.

\*\* Time estimate is included in the “CT planning” task.

\*\*\*Estimated minutes in parenthesis is particularly for Skull base chordoma’s.

Treatment and follow-up phase (in minutes)

| Care path activities | Physician | Treatment delivery RTT                                                                                                                                               | Estimation method |
|----------------------|-----------|----------------------------------------------------------------------------------------------------------------------------------------------------------------------|-------------------|
| Treatment delivery*  |           | (35 fraction scheme)<br>$25 \text{ min} \cdot 35 \cdot 3 \text{ RTT's} = 2625$<br><br>(37 fraction scheme)<br>$25 \text{ min} \cdot 37 \cdot 3 \text{ RTT's} = 2775$ | R&V system        |

|                                   |                                      |             |           |
|-----------------------------------|--------------------------------------|-------------|-----------|
| Consult during treatment**        | (35 fraction scheme)<br>15 · 7 = 105 |             | Interview |
|                                   | (37 fraction scheme)<br>15 · 7 = 105 |             |           |
| Follow-up at XXXX                 | 20<br>(After 1 month)                |             | Interview |
| <b>TOTAL (35 fraction scheme)</b> | <b>125</b>                           | <b>2625</b> |           |
| <b>TOTAL (37 fraction scheme)</b> | <b>125</b>                           | <b>2775</b> |           |

\* Each treatment fraction is executed by 3 RTTs each day

\*\* Summed estimate, based on weekly consultations

Total human resource consumption (in minutes)

|                                                       | Physician | Nurse | Treatment<br>imaging RTT | Treatment<br>planning RTT | Physicist | Medical<br>physics<br>engineer | Treatment<br>delivery RTT |
|-------------------------------------------------------|-----------|-------|--------------------------|---------------------------|-----------|--------------------------------|---------------------------|
| Preparation phase                                     | 380       | 85    | 200                      | 200                       | 45        | 110                            |                           |
| Preparation phase (skull base)                        | 560       | 85    | 200                      | 1030                      | 75        | 110                            |                           |
| Treatment and follow-up phase<br>(35 fraction scheme) | 125       | -     | -                        | -                         | -         | -                              | 2625                      |
| Treatment and follow-up phase<br>(37 fraction scheme) | 125       | -     | -                        | -                         | -         | -                              | 2775                      |

|                                                         |     |    |     |      |    |     |      |
|---------------------------------------------------------|-----|----|-----|------|----|-----|------|
| TOTAL for spinal column chordoma's (35 fraction scheme) | 505 | 85 | 200 | 200  | 45 | 110 | 2625 |
| TOTAL for spinal column chordoma's (37 fraction scheme) | 505 | 85 | 200 | 200  | 45 | 110 | 2775 |
| TOTAL for skull base chordoma's (35 fraction scheme)    | 685 | 85 | 200 | 1030 | 75 | 110 | 2625 |
| TOTAL for skull base chordoma's (37 fraction scheme)    | 685 | 85 | 200 | 1030 | 75 | 110 | 2775 |

Available fractionation schemes

| Fractionation schemes                            |                                                  |
|--------------------------------------------------|--------------------------------------------------|
| Chordoma (spinal column)                         | Skull base chordoma                              |
| Post-surgery and primary: <b>35</b> x 2Gy = 70Gy | Post-surgery and primary: <b>35</b> x 2Gy = 70Gy |
| Post-surgery and primary: <b>37</b> x 2Gy = 74Gy | Post-surgery and primary: <b>37</b> x 2Gy = 74Gy |



## Supplementary Materials S7: Eye melanoma

Preparation phase (in minutes)

| Care path activities            | Physician | Nurse | Treatment imaging RTT | Treatment planning RTT | Physics group | Medical physics engineer | Estimation method |
|---------------------------------|-----------|-------|-----------------------|------------------------|---------------|--------------------------|-------------------|
| Multicenter eye patient meeting | 20*       |       |                       |                        |               |                          | Interview         |
| Phone consultation              |           | 15    |                       |                        |               |                          | Time recording    |
| First consultation              | 45        | 15    |                       |                        |               |                          | Interview         |
| Overall administration          | 30        |       |                       |                        |               |                          | Interview         |
| Set-up meeting                  | 5         |       | 10*                   |                        |               |                          | Interview         |
| Immobilization mask             |           |       | 60*                   |                        |               |                          | Interview         |
| Eye simulation                  |           |       | 90*                   |                        |               |                          | Interview         |
| Image processing eye            |           |       | ***                   |                        |               |                          | Interview         |
| CTV definition                  | 240*      |       |                       |                        |               |                          | Interview         |
| Treatment planning              |           |       |                       | 150*                   |               |                          | Interview         |
| Approve treatment plan          | **        |       |                       |                        |               |                          | Interview         |
| Treatment plan meeting          | 20*       |       |                       |                        |               |                          | Interview         |
| Create aperture                 |           |       |                       |                        |               | 30*                      | Interview         |
| Dry run                         |           |       |                       | 70*                    |               |                          | Interview         |
| Treatment plan check            |           |       |                       |                        | 30            |                          | Interview         |
| QA eye                          |           |       |                       |                        |               | 90*                      | Interview         |

|                    |            |           |            |            |           |            |           |
|--------------------|------------|-----------|------------|------------|-----------|------------|-----------|
| Treatment approval |            |           |            |            | 5         |            | Interview |
| <b>TOTAL</b>       | <b>360</b> | <b>30</b> | <b>160</b> | <b>220</b> | <b>35</b> | <b>110</b> |           |

\* Summed time estimate based on two participating employees.

\*\* Time estimate is included in the “CTV definition” task.

\*\*\* Time estimate is included in the “Eye simulation” task.

Treatment and follow-up phase (in minutes)

|                                   | Physician                                                            | Treatment delivery RTT     | Estimation method |
|-----------------------------------|----------------------------------------------------------------------|----------------------------|-------------------|
| Treatment delivery*               | 40 min · 4 = 160                                                     | 40 min · 4 · 2 RTT's = 320 | Interview         |
| Consult during treatment**        | 25                                                                   |                            | Interview         |
| Follow-up<br>(phone consultation) | 15 · 3 = 45<br>(End of treatment, after 1 month<br>and after 1 year) |                            | Interview         |
| <b>TOTAL</b>                      | <b>240</b>                                                           | <b>320</b>                 |                   |

\*Each treatment fraction is executed by 2 RTTs and a physician each day

\*\* Once during the treatment phase

Total human resource consumption (in minutes)

|                               | Physician | Nurse | Treatment<br>imaging RTT | Treatment<br>planning RTT | Physicist | Medical<br>physics<br>engineer | Treatment<br>delivery RTT |
|-------------------------------|-----------|-------|--------------------------|---------------------------|-----------|--------------------------------|---------------------------|
| Preparation phase             | 360       | 30    | 160                      | 220                       | 35        | 110                            | -                         |
| Treatment and follow-up phase | 240       | -     | -                        | -                         | -         | -                              | 320                       |

|              |            |           |            |            |           |            |            |
|--------------|------------|-----------|------------|------------|-----------|------------|------------|
| <b>TOTAL</b> | <b>600</b> | <b>30</b> | <b>160</b> | <b>220</b> | <b>35</b> | <b>110</b> | <b>320</b> |
|--------------|------------|-----------|------------|------------|-----------|------------|------------|

Available fractionation scheme

| <b>Fractionation scheme</b> |
|-----------------------------|
| <b>4 x 15Gy = 60Gy</b>      |

## Supplementary Materials S8: Treatment plan adaptation (excluding eye melanoma)

Adaptation phase (in minutes)

| Care path activities      | Physician  | Treatment imaging RTT | Treatment planning RTT | Physics group | Medical physics engineer | Estimation method |
|---------------------------|------------|-----------------------|------------------------|---------------|--------------------------|-------------------|
| Immobilization mask       |            | 10*                   |                        |               |                          | R&V system        |
| CT planning               |            | 80*                   |                        |               |                          | R&V system        |
| Image processing          |            |                       | ***                    |               |                          | Interview         |
| CTV definition            | 30 to 90** |                       |                        |               |                          | Interview         |
| Treatment planning        |            |                       | 60                     |               |                          | Interview         |
| Treatment plan check      |            |                       | ***                    |               |                          | Interview         |
| Approve treatment plan    | 30         |                       |                        |               |                          | Interview         |
| Treatment plan meeting    | 20*        |                       | ***                    | 10            |                          | Interview         |
| Treatment plan processing |            |                       | ***                    |               |                          | Interview         |
| Plan processing check     |            |                       | ***                    |               |                          | Interview         |
| Treatment plan check      |            |                       |                        | 20            |                          | Interview         |
| Create QA plan            |            |                       |                        |               | 30                       | Interview         |
| Measure QA plan           |            |                       |                        |               | 60*                      | Time recording    |
| Check QA plan             |            |                       |                        | 2.5           |                          | Interview         |
| Treatment approval        |            |                       |                        | 2.5           |                          | Interview         |
|                           |            |                       |                        |               |                          |                   |
| <b>TOTAL (breast)</b>     | <b>80</b>  | <b>90</b>             | <b>60</b>              | <b>35</b>     | <b>90</b>                |                   |

|                               |     |    |    |     |    |  |
|-------------------------------|-----|----|----|-----|----|--|
| Average per patient (p = 10%) | 8   | 9  | 6  | 3.5 | 9  |  |
|                               |     |    |    |     |    |  |
| TOTAL (head & neck)           | 140 | 90 | 60 | 35  | 90 |  |
| Average per patient (p = 80%) | 112 | 72 | 48 | 28  | 72 |  |

\* Summed time estimate based on two participating employees.

\*\* CTV definition varies between 30 minutes for breast plan adaptations and 90 minutes for head & neck plan adaptations.

\*\*\* Time estimates are included in the "Treatment planning" task.
